# Supplementary material
Source: PubMed Central journal article supplement (PMC8013831)
Supplement: EMBJ-40-e106018-s004.pdf [file EMBJ-40-e106018-s004.pdf]

**Sessa *et al.*, BRCA2 promotes R-loop resolution by DDX5 helicase at DNA breaks to facilitate their repair by homologous recombination**

**Table of Contents:**

**Appendix Tables S1-3**

**Appendix Table S1:** Primers used to subclone DDX5 into the pEGFP-N3 vector

| Construct | Oligo name | Sequence (5'-3')                              |
|-----------|------------|-----------------------------------------------|
| DDX5-GFP  | Fw: oAC953 | CGTGTCGACATGTCGGGTTATTCGAGTGAC<br>CGAGAC      |
|           | Rv: oAC967 | CGTACCGGTCCTTGGGAATATCCTGTTGGC<br>ATTGGATAACC |

**Appendix Table S2.** siRNA used in this study

| siRNA                               |                         |                         |
|-------------------------------------|-------------------------|-------------------------|
| TARGET AND SEQUENCES (5'-3')        | SOURCE                  | IDENTIFIER              |
| BRCA2<br>CAGCGTTTGTGTATCGGGCAA      | Qiagen                  | Cat# SI00000966         |
| BRCA2 ON-TARGETplus SMARTpool       | Dharmacon               | Cat# L-021420-00        |
| BRCA2<br>GAAGAAUGCAGGUUAAUA         | Dharmacon               | Cat# D-003462-04        |
| DDX5<br>GCUCUUUAUAUUGUGUGUUAU       | Mazurek et al.,<br>2012 | N/A                     |
| SETX ON-TARGETplus SMARTpool        | Dharmacon               | Cat# L-003462-00        |
| Non targeting oligonucleotide (siC) | Dharmacon               | Cat# D-001810-01-<br>20 |

**Appendix Table S3.** DNA and RNA sequences used for R loop and DNA-RNA

hybrid substrate preparation

| <b>Oligonucleotides</b>                                                                                                                                    |                  |                   |
|------------------------------------------------------------------------------------------------------------------------------------------------------------|------------------|-------------------|
| <b>NAME AND SEQUENCES (5'-3')</b>                                                                                                                          | <b>SOURCE</b>    | <b>IDENTIFIER</b> |
| oAC862 (PAGE purified)<br><br>GTACCCGGGGATCCTCTAGAGTCGAGC<br>GTCGATCCGAACTTGGCACTGGCCGTC<br>GTTTTACAAC (used for R-loop and DNA-<br>RNA hybrid substrates) | Song et al. 2017 | N/A               |
| oAC863 (PAGE purified)<br><br>GTTGTAAAACGACGGCCAGTGCCTTTTC<br>CCAGCCTCAATCTCATCACTCTAGAGGA<br>TCCCCGGGTAC (used for R-loop<br>substrate)                   | Song et al. 2017 | N/A               |
| oAC864 (PAGE purified)<br><br>GUUUCGGAUCGACGC (used for R-loop<br>and DNA-RNA hybrid substrates)                                                           | Song et al. 2017 | N/A               |
