# Supplementary material
Source: PubMed Central journal article supplement (PMC8013831)
Supplement: EMBJ-40-e106018-s008.pdf [file EMBJ-40-e106018-s008.pdf]

## Expanded View Figures

### Figure EV1. Related to Fig 1. DEAD-box proteins identified in the proteomics mass spectrometry screen.

- A Amylose pull-down from HEK293T nuclear cell extracts expressing 2xMBP-BRCA2NT (BRCA2<sub>NT</sub>) and 2xMBP, detected by immunoblot, showing the samples for mass spectrometry experiment. The loading for input and unbound fractions is 1%, for the elution fraction is 8%, and for boiled bead fraction is 35%.
- B DEAD-box helicases enriched in the BRCA2<sub>NT</sub> interactome. Label-free protein quantification. (Left) BRCA2 (in italic) and DDX Protein ID present in the proteomics mass spectrometry screen. (Center) Heat-map showing fold enrichment of each protein in BRCA2NT/2xMBP. Infinite-fold indicates proteins that are only present in BRCA2NT sample and not in pull-down performed with the 2xMBP. (Bottom) Heat-map log<sub>2</sub> color scale. (Right) Bar graph showing protein abundance in molar fraction percentage (mol %) in each pull-down (yellow in 2xMBP, blue in BRCA2<sub>NT</sub>) based on label-free emPAI quantification (see Materials and Methods section).
- C Immunoprecipitation (IP) of endogenous BRCA2 from benzonase-treated HEK293T whole cell lysates treated or not with IR (6 Gy), as indicated. Normal mouse IgG was used as negative control. Immunoblot of DDX5, DDX21 and RBMX and BRCA2. Stain-Free images of the gels before transfer were used as loading control (cropped images are shown).

**A**

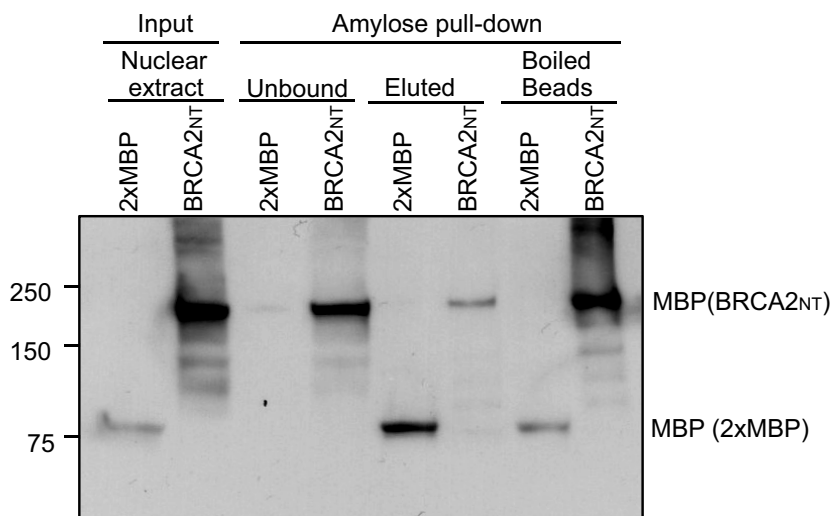

**B**

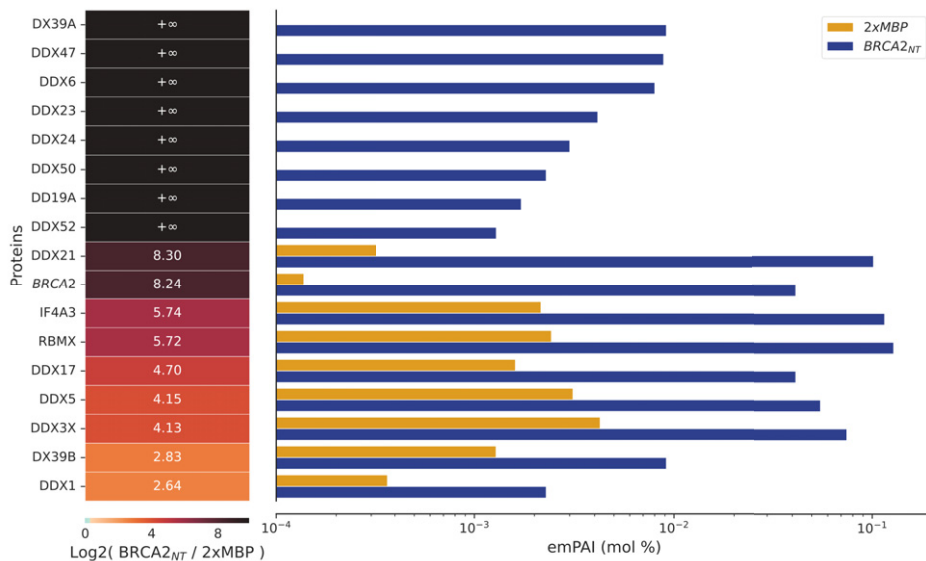

**C**

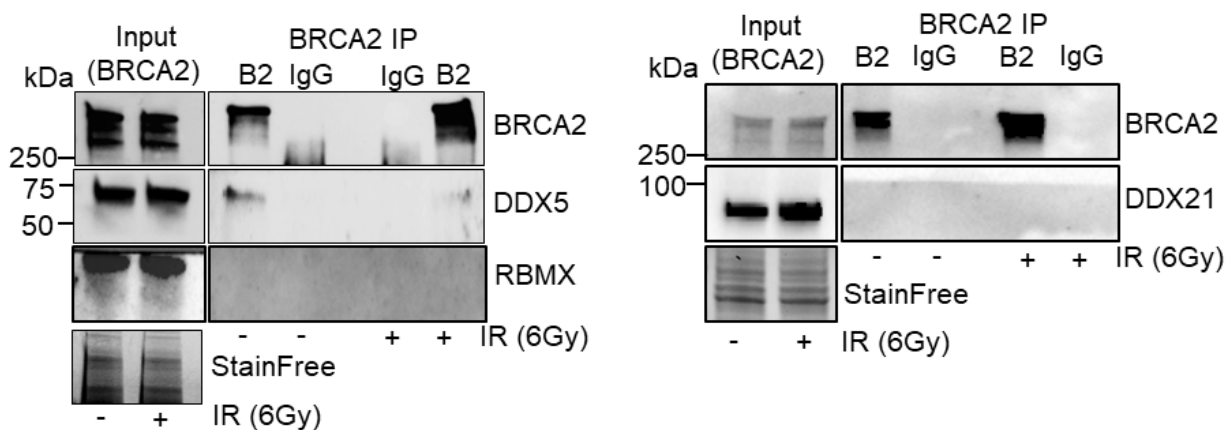

Figure EV1.

**Figure EV2. Related to Figs 1 and 2. DNA-RNA hybrids levels in BRCA2- and DDX5-depleted cells and localization of DDX5 at DNA-RNA hybrids.**

- A Left: Quantification of the relative intensity of S9.6 staining. The data represent at least 500 cells per condition from three independent experiments. The red line in the scatter plot represents the median. For statistical comparison of the differences between the samples, we applied Kruskal–Wallis test followed by Dunn's multiple comparison test and the *P*-values show significant differences. Right: Representative immunofluorescence images of U2OS cells depleted of DDX5 (siDDX5), BRCA2 (siBRCA2), or control cells (siC) and stained with S9.6 antibody (DNA-RNA hybrids) and counterstained with DAPI. When indicated, cells were transfected/treated with RNase H1 (RH) 24 h before fixation. Scale bar indicates 10  $\mu$ m.
- B Left: Representative images of S9.6 immunofluorescence of U2OS cells depleted of DDX5 (siDDX5) or control cells (siC) expressing RNaseH1-GFP and/or DDX5-GFP. Scale bar indicates 10  $\mu$ m. Right: Quantification of S9.6 average nuclear intensity of U2OS cells depleted of DDX5 (siDDX5) or control cells (siC) expressing RNaseH1-GFP and/or DDX5-GFP. The red line in the plot indicates the median, and each symbol represents the value of a single cell. The statistical significance of the difference was calculated with Mann–Whitney *U*-test; the *P*-values show the significant difference. The data represent at least 170 cells per condition from one single experiment.
- C Left: Representative images of *in situ* PLA experiment performed between DDX5 and S9.6 antibodies in U2OS cells. When indicated, cells were treated with cordycepin (Cordy) for 2 h at 37°C before fixation. Single antibody controls from untreated cells are shown. Scale bar indicates 10  $\mu$ m. Nuclei as defined by auto threshold plugin on the DAPI image (ImageJ) are outlined in yellow. Right: Quantification of the number of PLA spots per nucleus in different conditions, as indicated. The data represent at least 200 cells per condition from three independent experiments. For statistical comparison of the differences between the samples, we applied a Kruskal–Wallis test followed by Dunn's multiple comparison test and the *P*-values show significant differences. The red line in the plot indicates the median, and each symbol represents a single PLA spot.

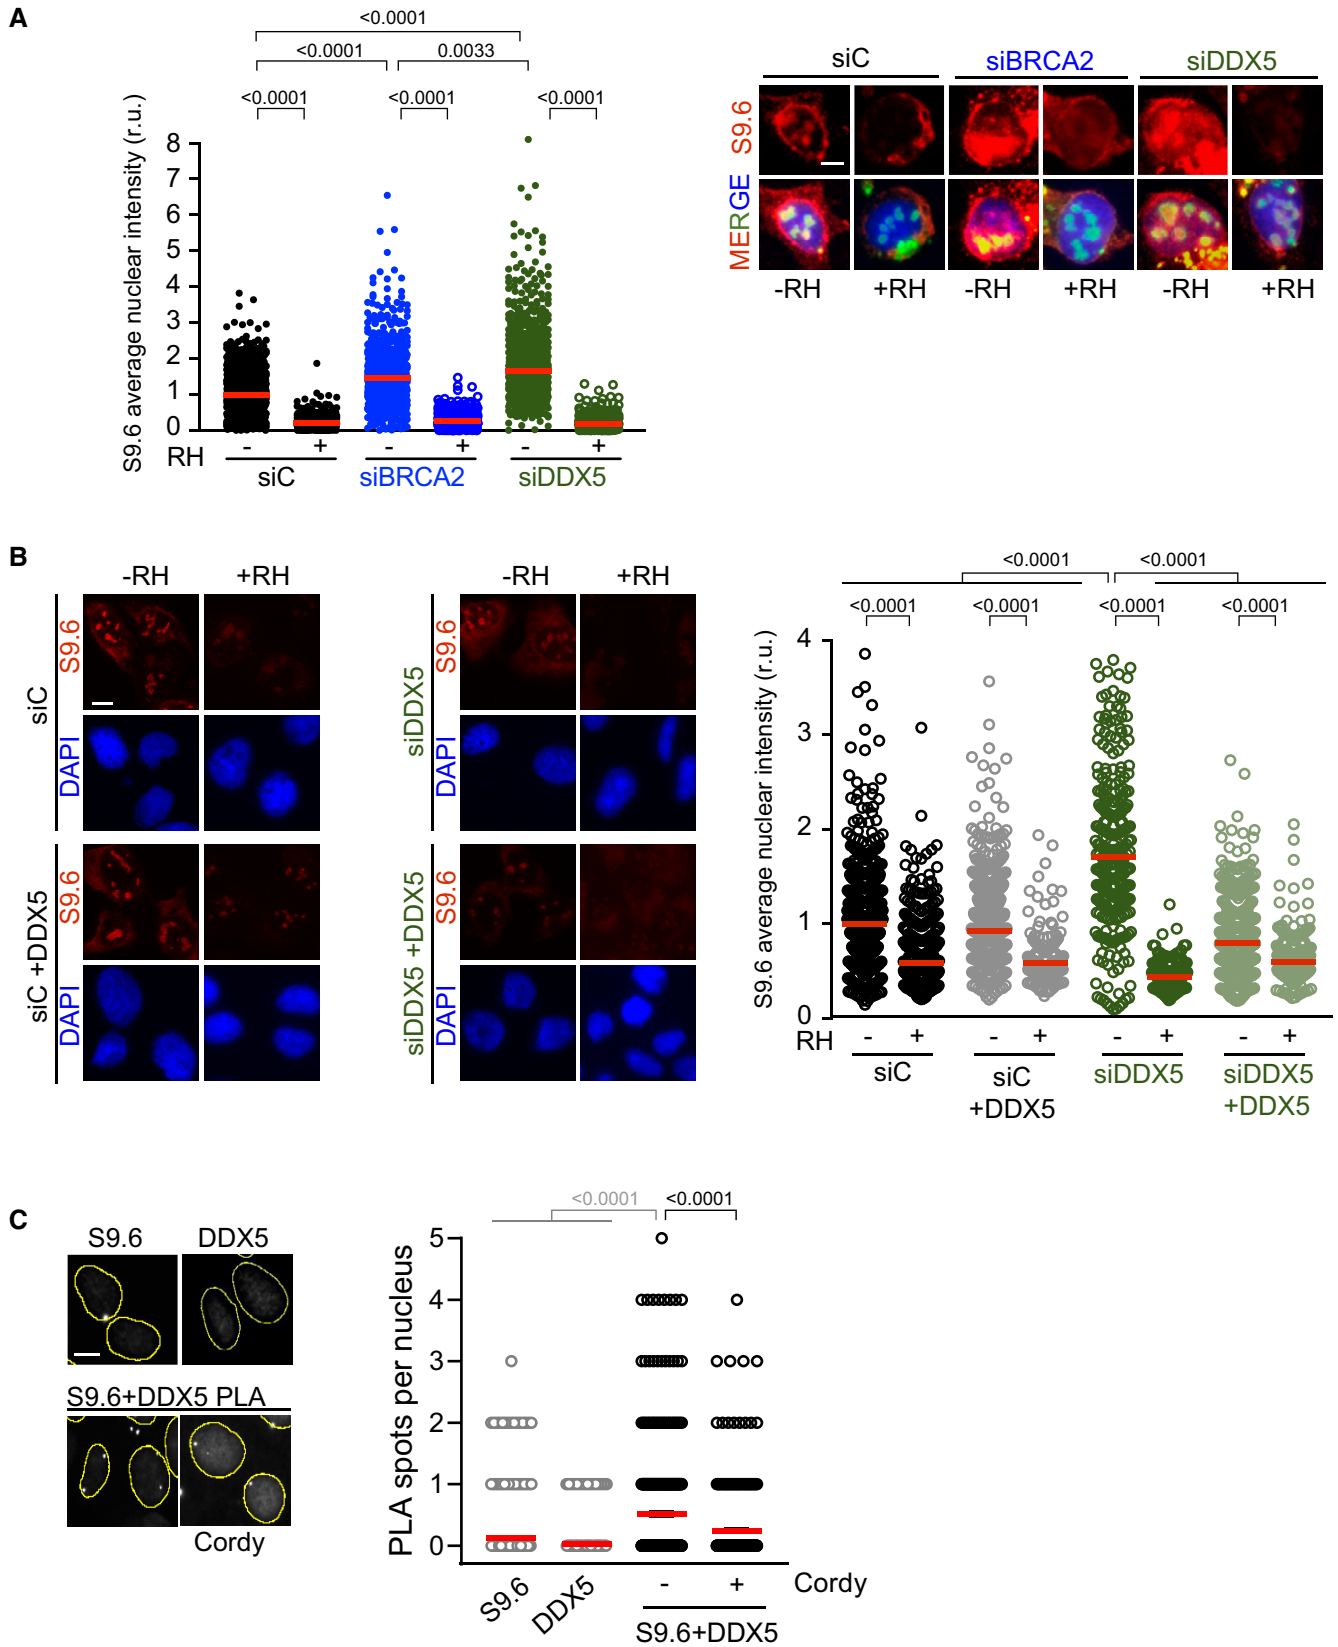

Figure EV2.

**Figure EV3. Related to Fig 2. Reproducibility of the DRIPc-seq data.**

- A Relative DRIP-qPCR signal values (respect to the siC level at each locus) at the *APOE*, *HIST1H2BG*, and *WDR90* loci in K562 cells transfected with the indicated siRNAs and treated *in vitro* with RNase H1 (RH) pre-immunoprecipitation where indicated. The data represent the mean  $\pm$  SEM from two independent experiments. The statistical significance of the difference was calculated with paired Student *t*-test, and the *P*-values show the significant difference.
- B Representative screenshots of specific genomic regions showing the DRIPc-seq profiles without DNA strand separation in K562 cells depleted of DDX5 (siDDX5) from three independent experiments as compared to data from control cells (siC). Two regions with different Alu sequence density are shown for comparison.
- C *xy* correlation plot between the DRIPc signal intensity from two DRIPc-seq independent experiments performed in DDX5-depleted K562 cells (PCC, Pearson correlation coefficient).

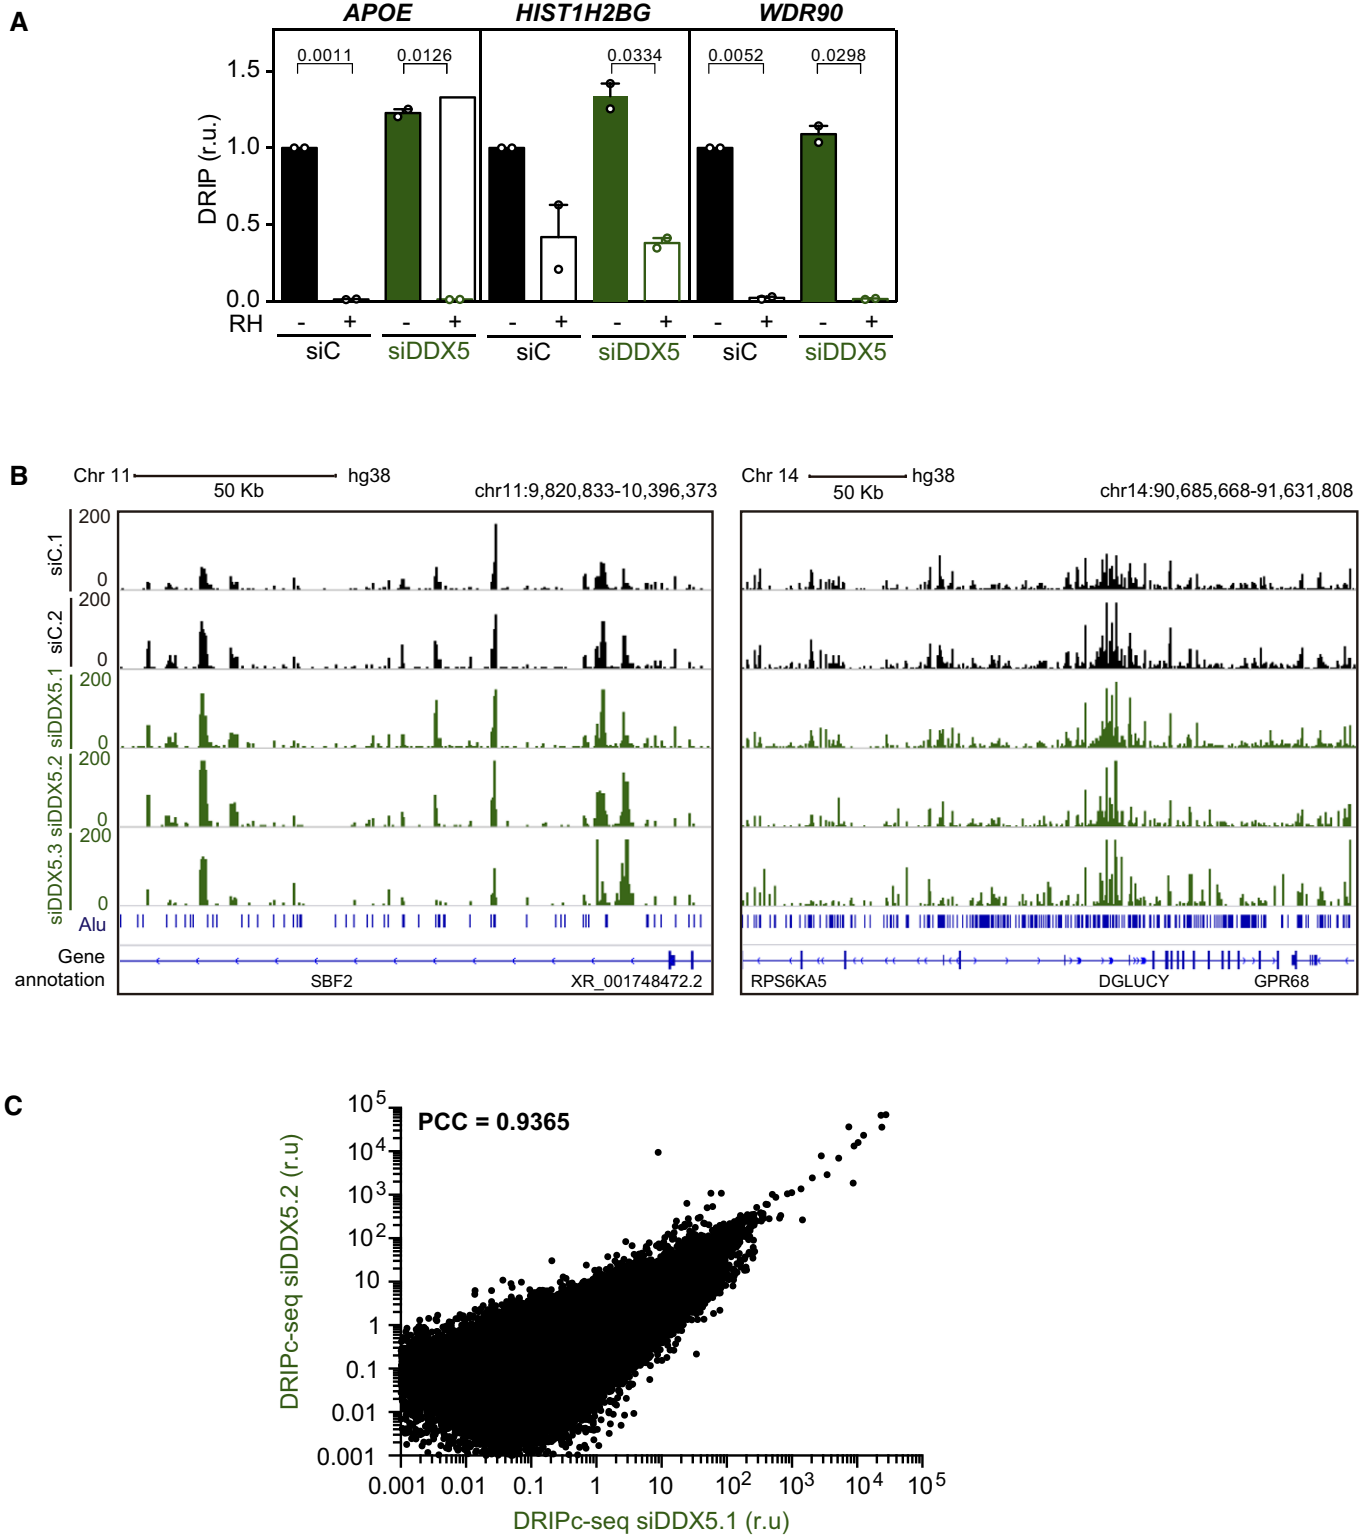

Figure EV3.

**Figure EV4. Related to Fig 3. NBS1 co-localization with DNA-RNA hybrids in U2OS depleted of DDX5 or BRCA2 and DNA-RNA hybrids, transcription levels, and DDX5 occupancy at different genomic locations in U2OS DiVA cells.**

- A Left: Representative images of *in situ* PLA experiment performed between NBS1 and S9.6 antibodies in U2OS cells transfected with either siRNA control (siC) or siRNA specific for DDX5 (siDDX5). When indicated, cells were transfected with RNaseH1 (RH) 24 h before fixation. Single antibody controls from untreated cells are shown. Scale bar indicates 10  $\mu$ m. Nuclei as defined by auto threshold plugin on the DAPI image (ImageJ) are outlined in yellow. Right: Quantification of the number of PLA spots per nucleus in different conditions, as indicated. The data represent at least 400 cells per condition from three independent experiments. For statistical comparison of the differences between the samples, we applied a Kruskal–Wallis test followed by Dunn's multiple comparison test and the *P*-values show significant differences. The red line in the plot indicates the median, and each symbol represents a single PLA spot.
- B DRIP-qPCR signal values at *RBMXL1*, *ASXL1*, *HIST1H2BG*, *WDR90*, and *SNPRN* loci in U2OS DiVA cells transfected with the indicated siRNAs and treated *in vitro* with RNase H1 (RH) pre-immunoprecipitation where indicated. The experiment was performed in both untreated cells (–OHT) and after tamoxifen addition (+OHT). The data represent the mean  $\pm$  SEM from at least four independent experiments. The statistical significance of the difference was calculated with unpaired one-tailed Student *t*-test, and the *P*-values show the significant differences.
- C Relative *RBMXL1*, *ASXL1*, *HIST1H2BG*, *WDR90*, and *SNPRN* gene expression levels in U2OS DiVA cells transfected with the indicated siRNAs. The data represent the mean  $\pm$  SEM from two or three independent experiments. The statistical significance of the difference was calculated with unpaired Student *t*-test; the *P*-values show the significant differences.
- D  $\gamma$ H2AX (top) and DDX5 (bottom) ChIP-qPCR signal values at *RBMXL1*, *ASXL1*, *HIST1H2BG*, *WDR90*, and *SNPRN* loci in U2OS DiVA cells transfected with the indicated siRNAs and either left untreated (–OHT) or treated with tamoxifen (+OHT). The green line represents the background levels of DDX5 signal. The data represent the mean  $\pm$  SEM from at least three independent experiments. The statistical significance of the difference was calculated with unpaired one-tailed Student *t*-test, and the *P*-values show the significant differences.

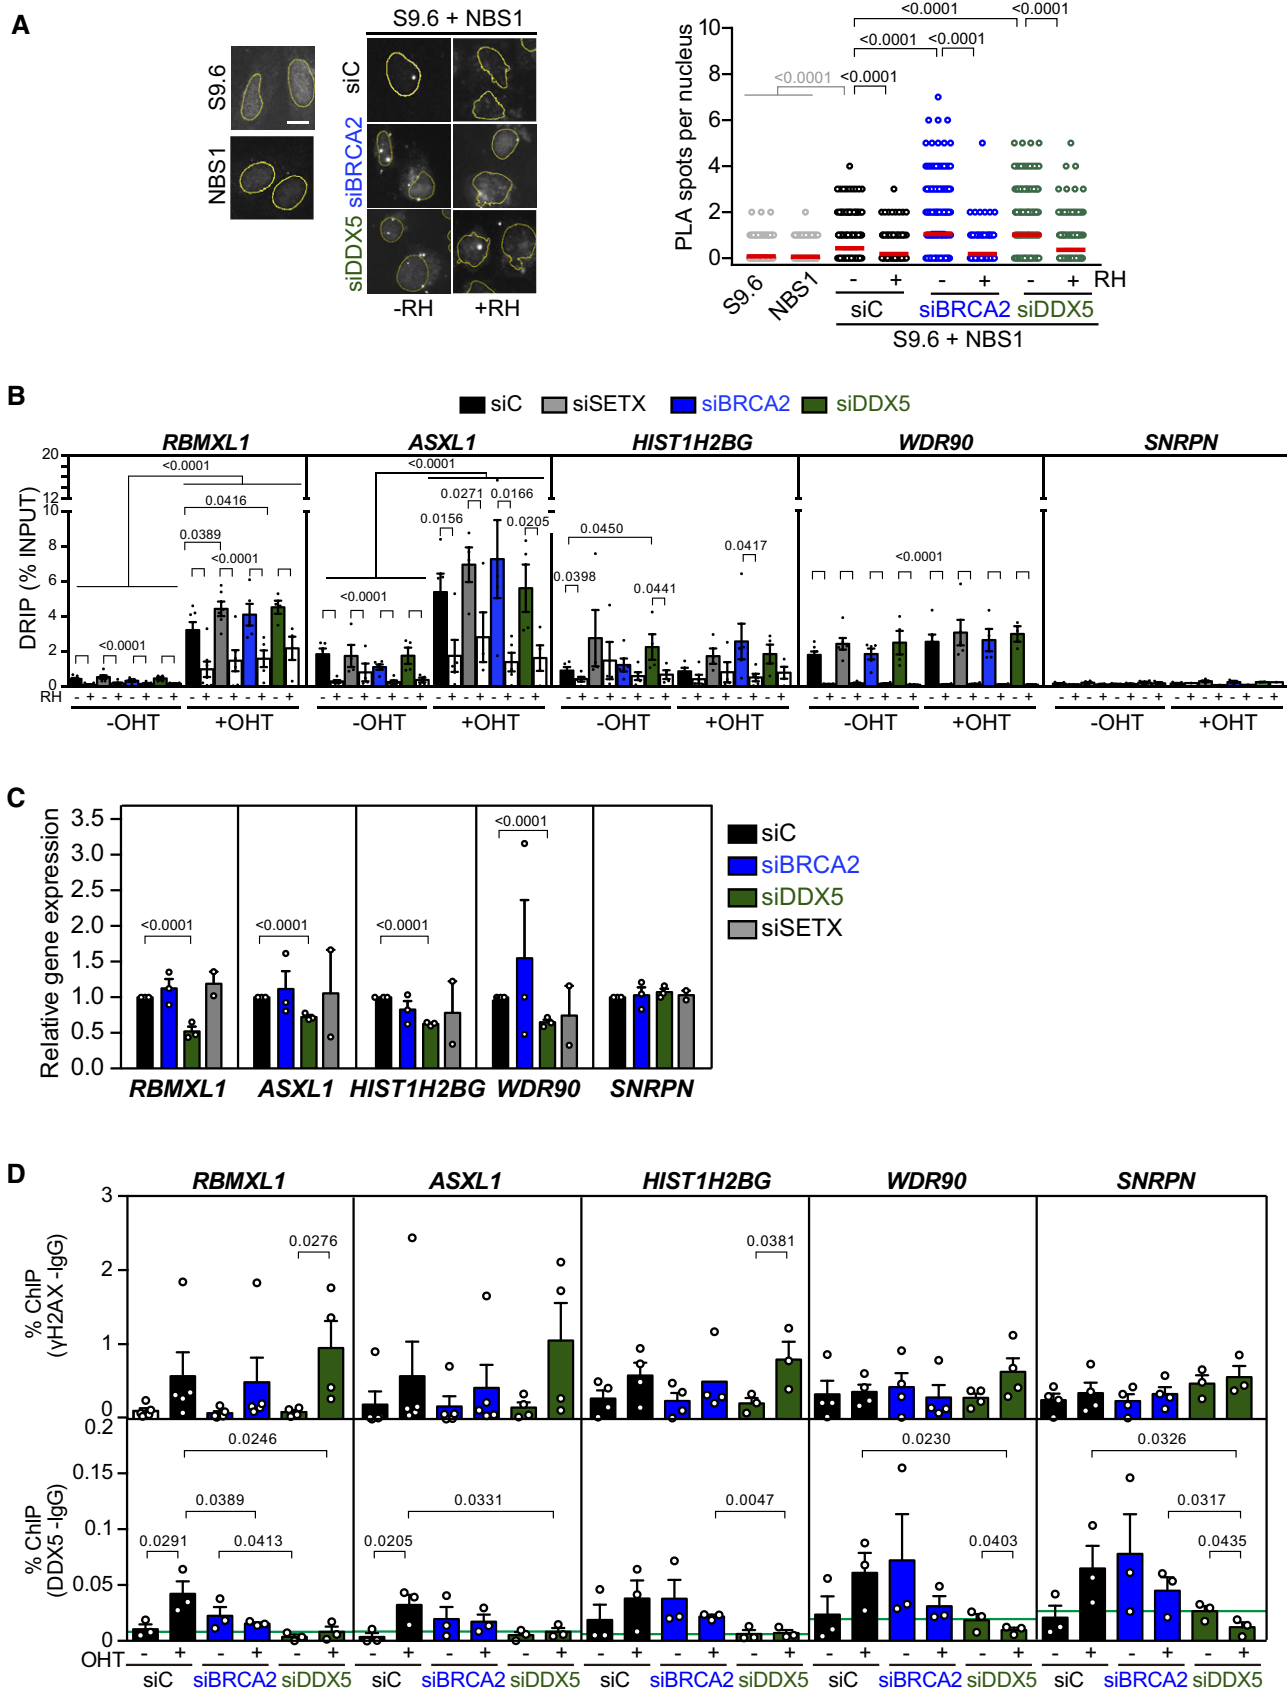

Figure EV4.



**Figure EV5. Related to Figs 5–8. Effect of BRCA2<sub>T2</sub> and BRCA2 on DDX5 R-loop and DNA-RNA hybrid-unwinding activity; accumulation of DNA-RNA hybrids in BRCA2-deficient DLD1 cells; interaction of BRCA2<sub>T1</sub>-T207A with DDX5; and kinetics of DNA damage accumulation in cells depleted of DDX5 or in cells bearing BRCA2-T207A mutation.**

- A Top: PAGE gel showing a representative unwinding assays in which purified MBP-DDX5-GST (1–5 nM) was incubated with <sup>32</sup>P-labeled synthetic R-loop substrate in the presence or absence of 50 nM purified 2xMBP-BRCA2<sub>T2</sub>. Bottom: Quantification of the unwinding experiments showing the percentage of free RNA relative to the R-loop substrate (unwound product) as a function of DDX5 concentration alone (black) or in the presence of BRCA2<sub>T2</sub> (red). Bottom right: SDS-PAGE gel showing 1 μg of purified 2xMBP-BRCA2<sub>T2</sub> used for the unwinding assay. The data represent the mean ± SD of two independent experiments.
- B Top: PAGE gel showing a representative unwinding assays in which purified MBP-DDX5-GST (1–5 nM) was incubated with <sup>32</sup>P-labeled synthetic DNA-RNA hybrid substrate in the presence or absence of 2 nM purified EGFP-MBP-BRCA2. Bottom: Quantification of the unwinding experiments showing the percentage of free RNA relative to the DNA-RNA hybrid substrate (unwound product) as a function of DDX5 concentration alone (black) or in presence of BRCA2 (red). The data represent the mean ± SD of three independent experiments.
- C Quantification of the average nuclear intensity of S9.6 antibody in DLD1 BRCA2<sup>+/+</sup> (+/+) and BRCA2<sup>-/-</sup> (-/-) cells. The red line in the plot indicates the median, and each symbol represents the value of a single cell. The data represent at least 2,000 cells per condition from four independent experiments. The statistical significance of the difference was calculated with Mann–Whitney *U*-test; the *P*-values show the significant difference.
- D Relative DRIP-qPCR signal values (respect to the siC level at each locus) at the *MALAT1*, *RRPH1*, and *HIST1H2BG* loci in DLD1 BRCA2<sup>+/+</sup> (+/+) and BRCA2<sup>-/-</sup> (-/-) cells and treated *in vitro* with RNase H1 (RH) pre-immunoprecipitation where indicated. The data represent the mean ± SEM from five independent experiments. The statistical significance of the difference was calculated with unpaired Student *t*-test, and the *P*-values show the significant difference.
- E GST pull-down assay using purified BRCA2<sub>T1</sub> (T1) or BRCA2<sub>T1</sub>-T207A (T1-T207A) and DDX5. MBP antibody was used for the detection of both proteins. UB: unbound; E: eluate. Right: Quantification of the GST pull-down experiments calculated as the pulled-down BRCA2<sub>T1</sub> (WT and T207A) with DDX5 relative to the input levels of BRCA2<sub>T1</sub> (WT and T207A) and the amount of pulled-down MBP-DDX5-GST. Results are presented as the fold change compared to the BRCA2 WT clone. The data represent the mean ± SD of three independent experiments. The statistical significance of the difference was calculated with unpaired *t*-test, and the *P*-values show the significant difference.
- F Top: Representative immunofluorescence images of cells hybridized with anti-γH2AX antibody in U2OS cells depleted of DDX5 (siDDX5) and in control cells (siC) in cells left untreated (–) or at different time points after exposure to IR (6 Gy), as indicated. Scale bar indicates 10 μm. Nuclei as defined by auto threshold plugin on the DAPI image (ImageJ) are outlined in yellow. Bottom: Graph showing the average number of γH2AX foci. The data represent the mean ± SEM of three independent experiments.
- G Top: Representative immunofluorescence images of three independent experiments of nuclear γH2AX foci in BRCA2-deficient DLD1 cells (BRCA2<sup>-/-</sup>) or BRCA2<sup>-/-</sup> bearing BRCA2 WT (WT) or BRCA2-T207A (T207A) variant in cells left untreated or at different time points after exposure to IR (6Gy), as indicated. Scale bar indicates 10 μm. Nuclei as defined by auto threshold plugin on the DAPI image (ImageJ) are outlined in yellow. Bottom: Graph showing the average number of γH2AX foci. The data represent the mean ± SEM of three independent experiments.
- H Top: Representative immunofluorescence images of DLD1 BRCA2-T207A stained for γH2AX and RAD51 in non-treated conditions. When indicated, cells were transfected with a plasmid expressing RNaseH1 (+RH) 48 h prior fixation. Right: Quantification of the number of γH2AX foci (left) or RAD51 foci (right) per nucleus. The data shown are from at least 400 cells per condition from three independent experiments. For statistical comparison of the differences between the samples, we applied a Kruskal–Wallis test followed by Dunn's multiple comparison test and no statistically significant differences were found. The red line in the plot indicates the median, and each symbol represents a single focus.

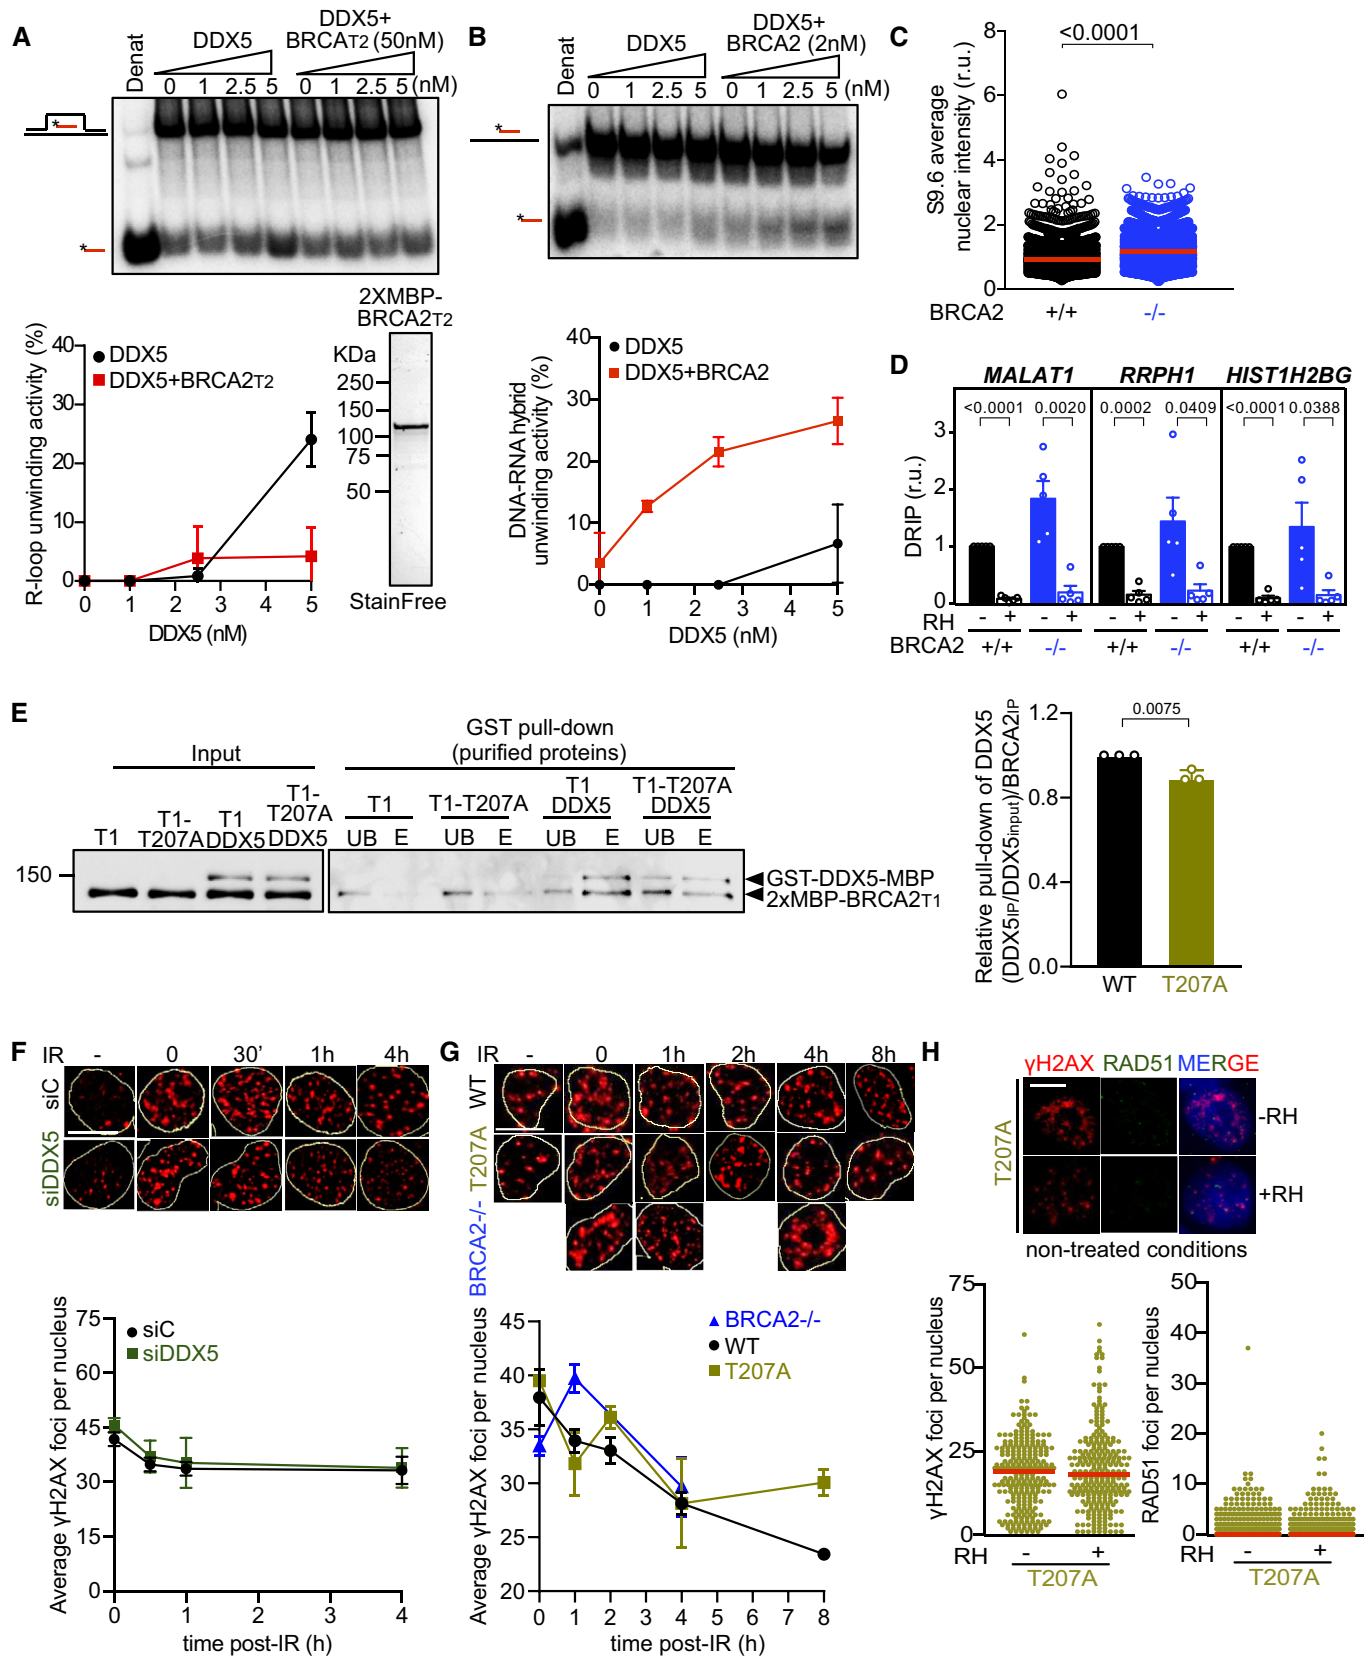

Figure EV5.
