# Supplementary material
Source: PubMed Central journal article supplement (PMC8013831)

A

BRCA2

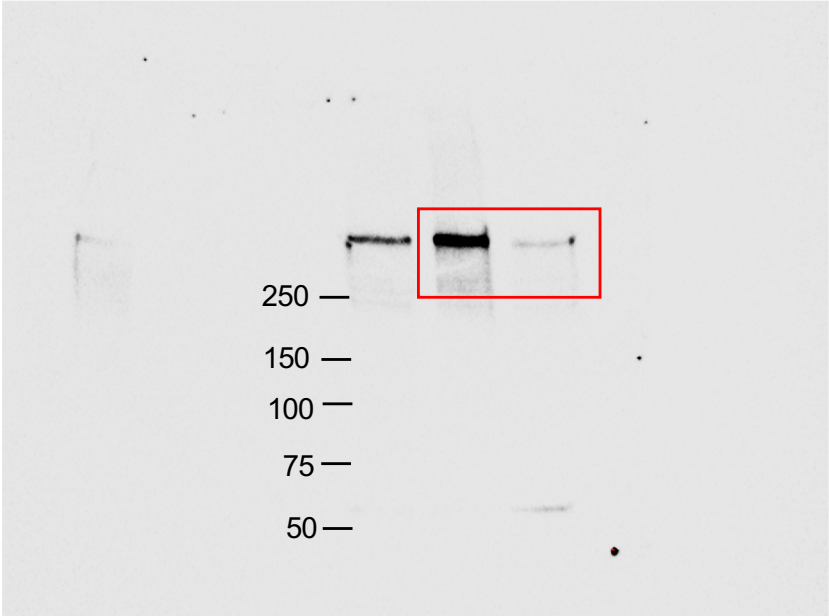

Stainfree

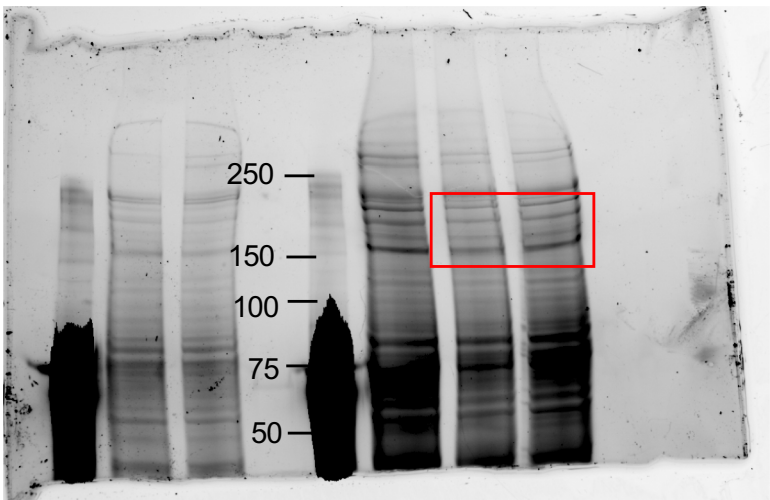

Supplement: EMBJ-40-e106018-s001.pdf [file EMBJ-40-e106018-s001.pdf]

**A**

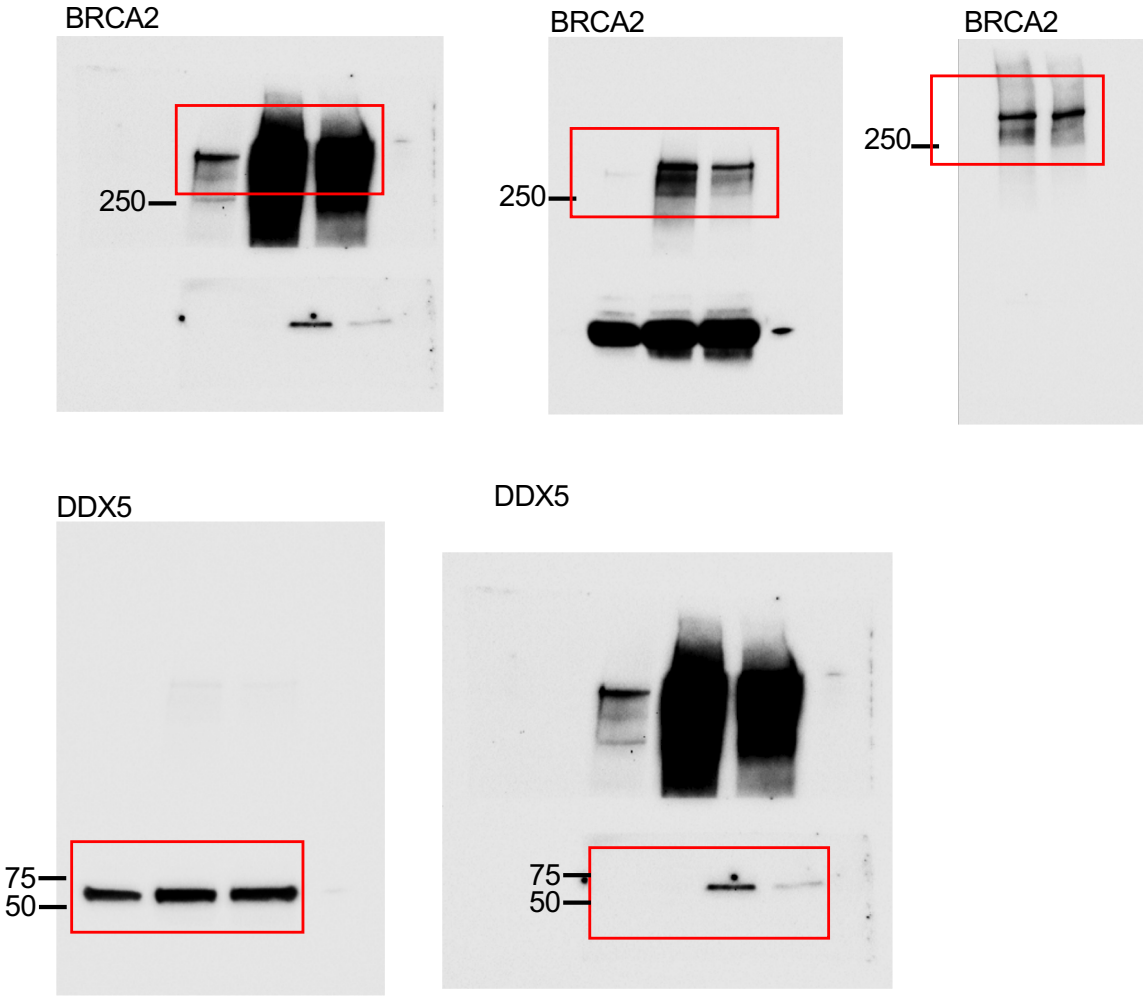

Supplement: EMBJ-40-e106018-s003.pdf [file EMBJ-40-e106018-s003.pdf]

**A**

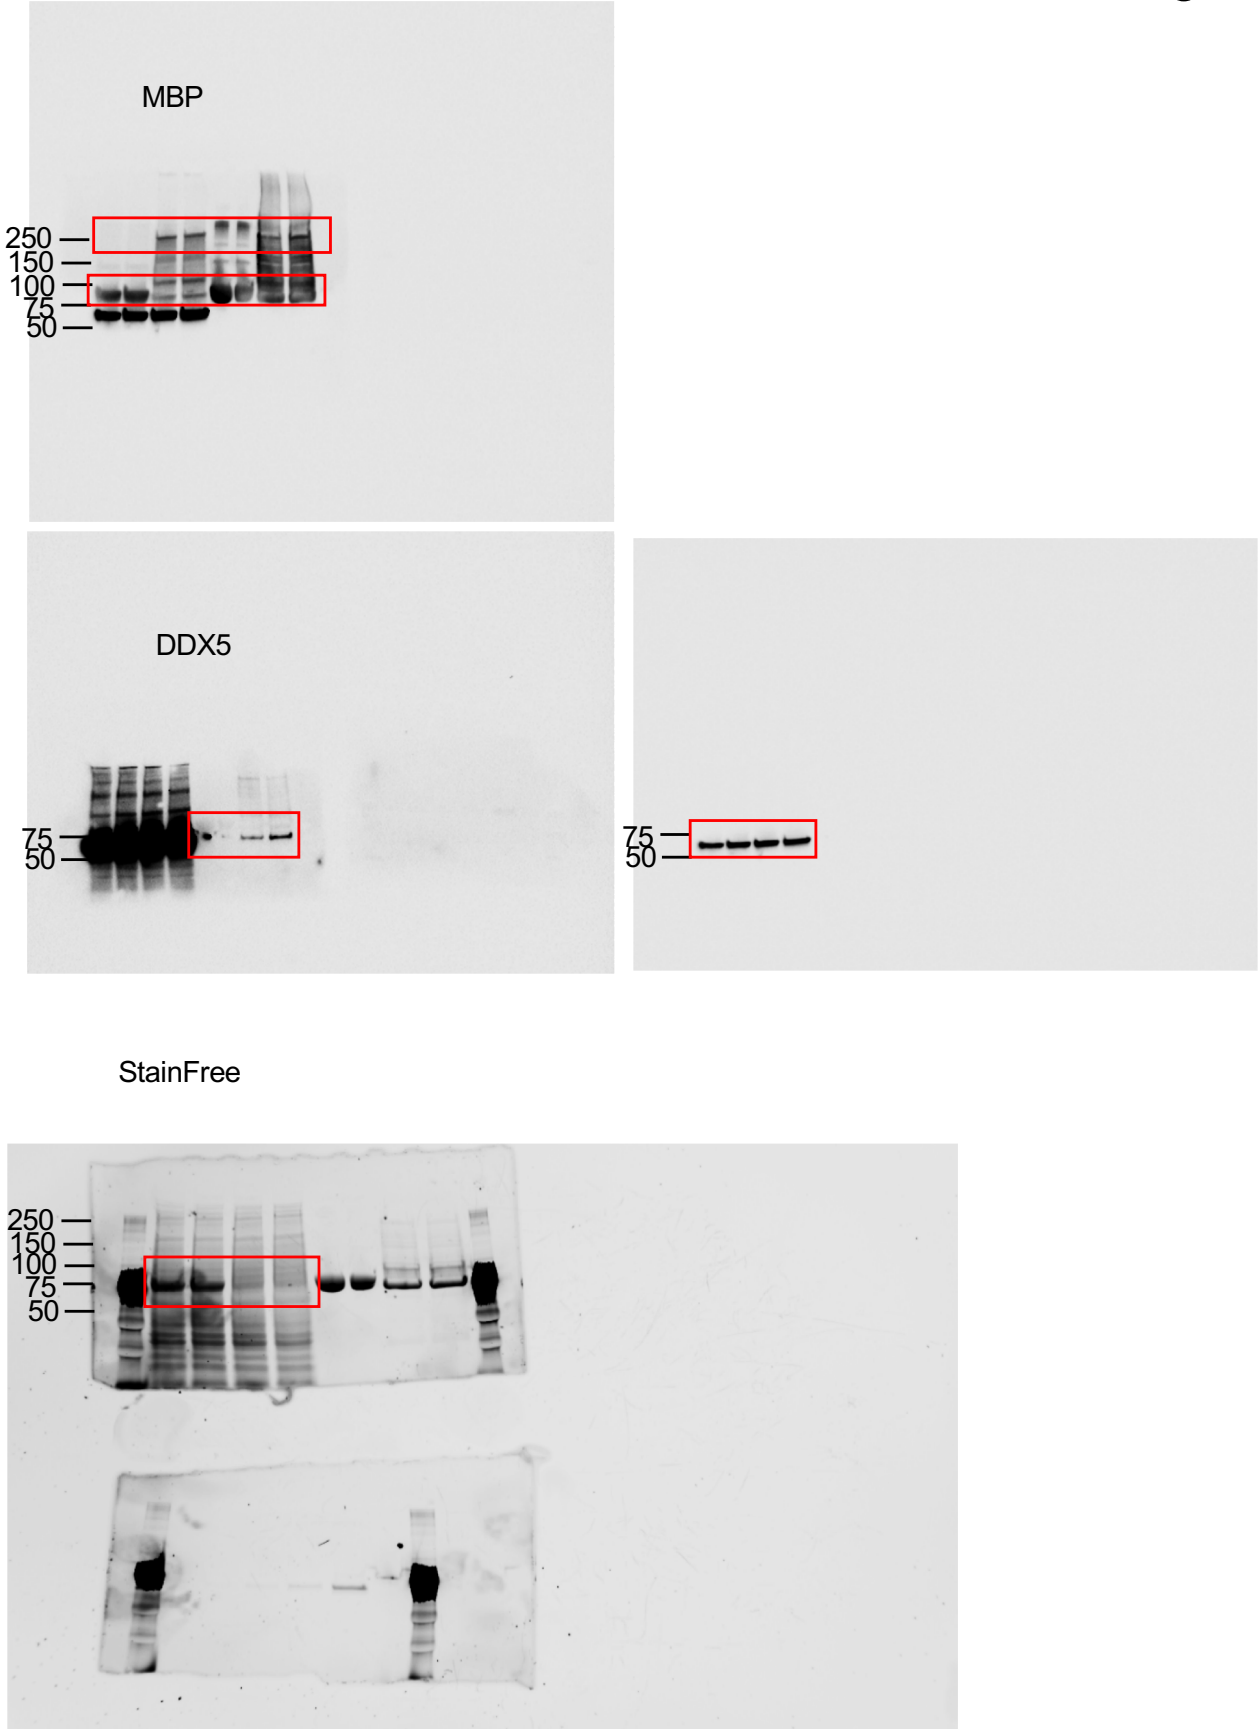

**B**

BRCA2

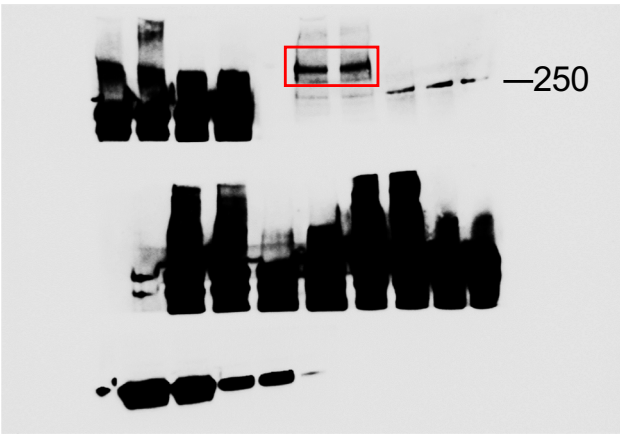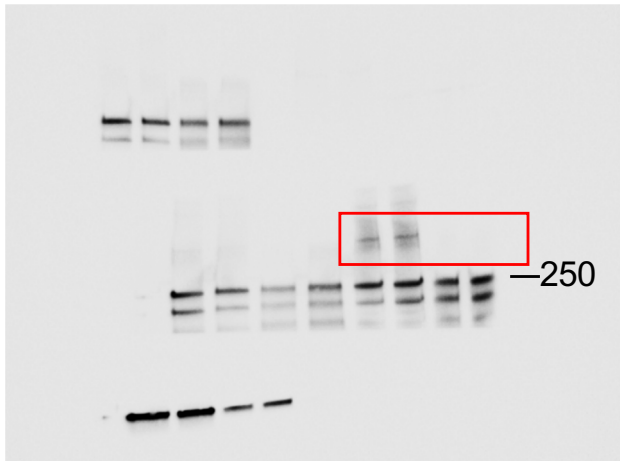

DDX5

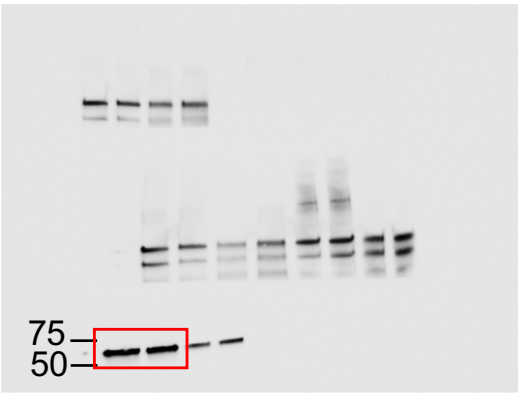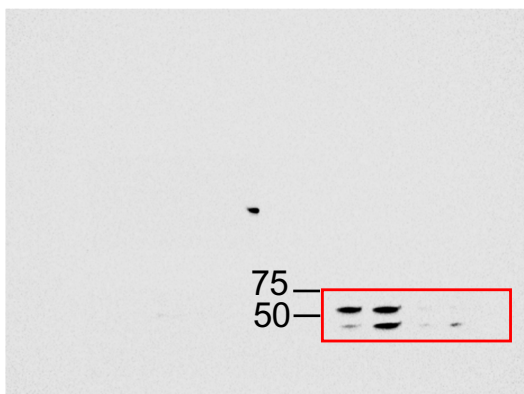

StainFree

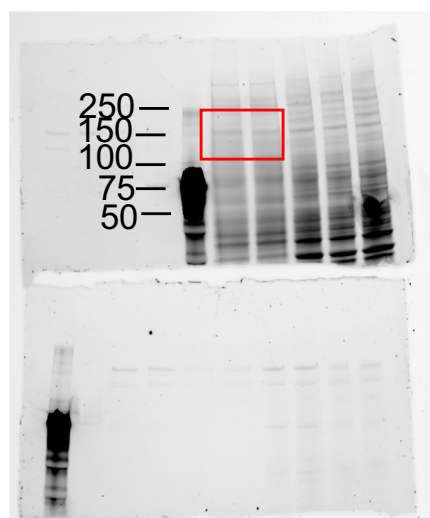

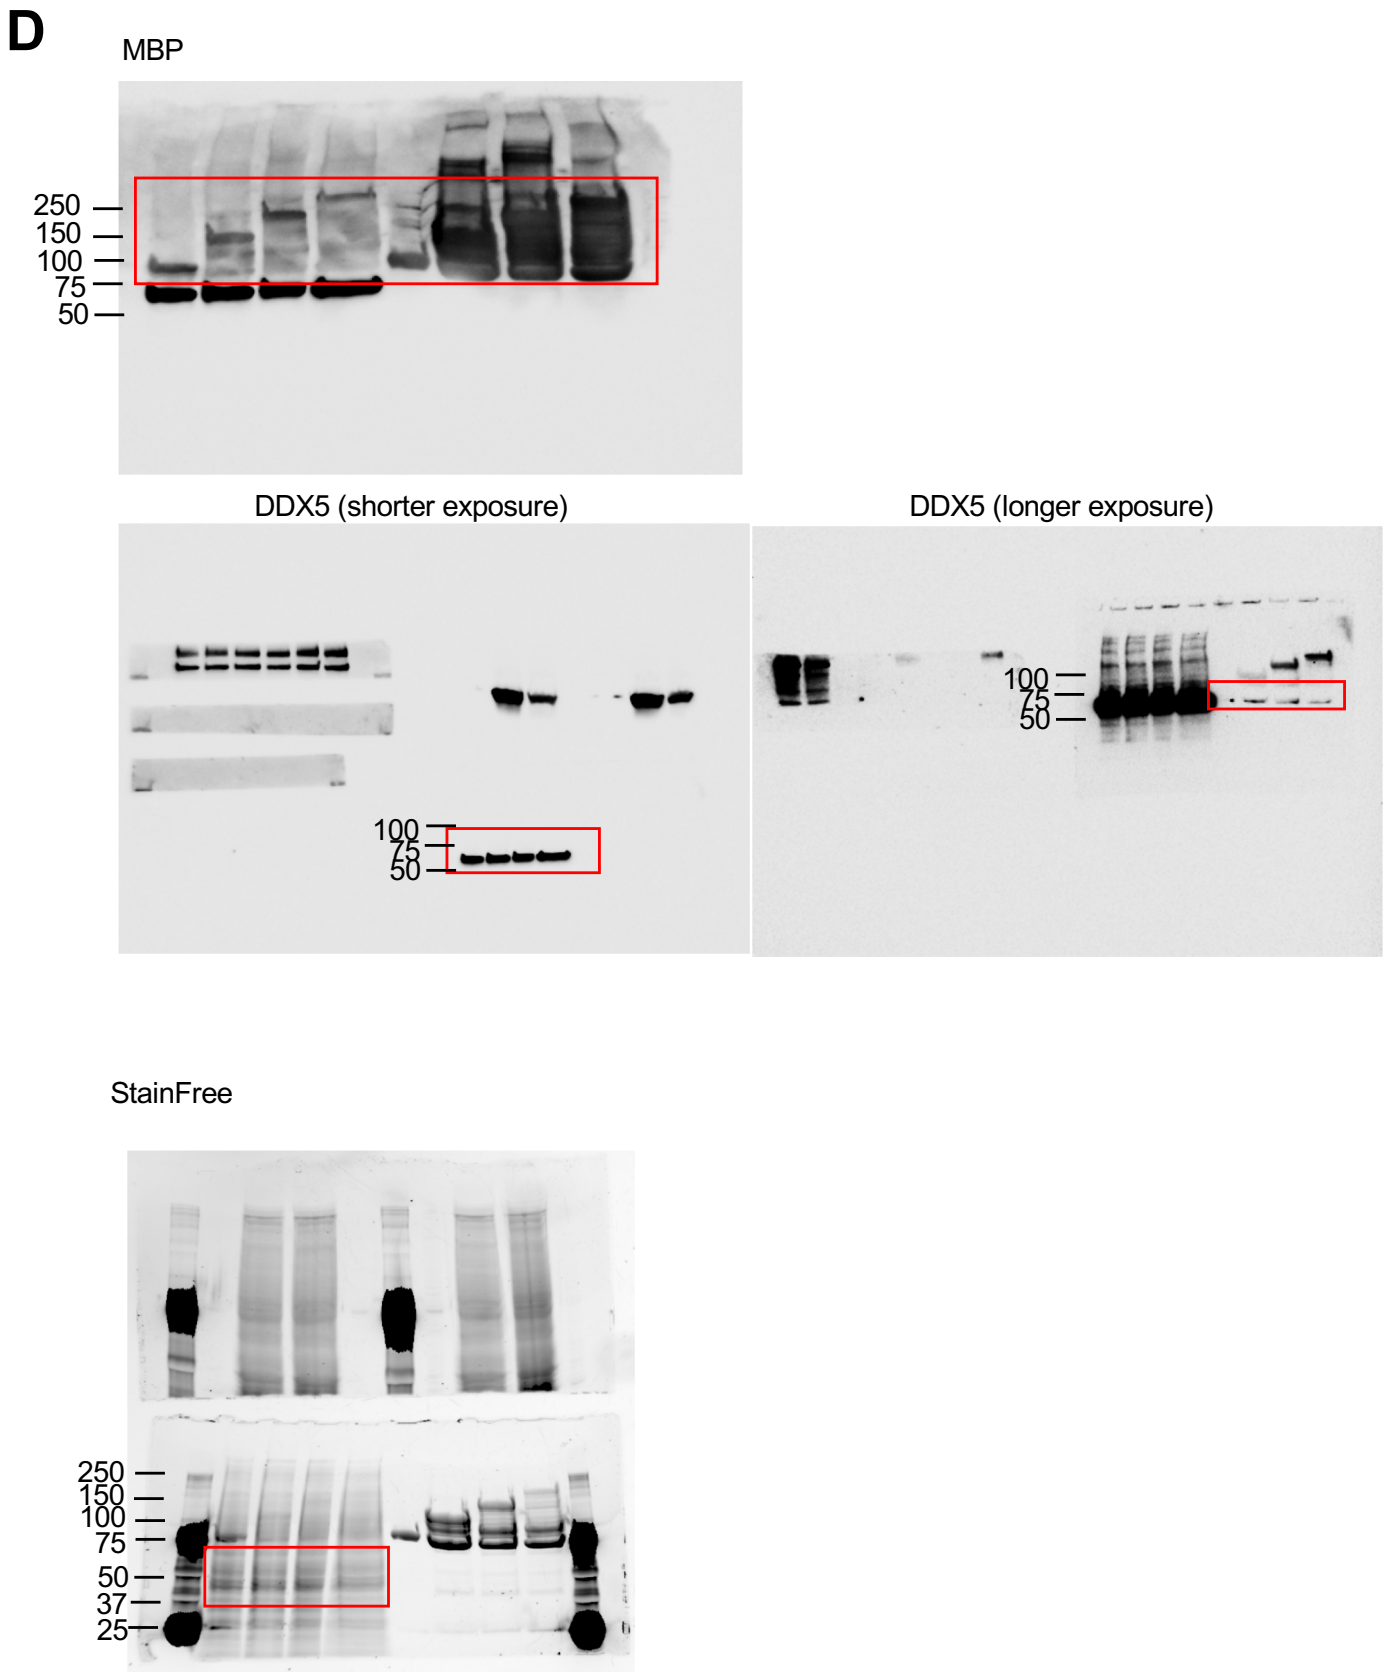

E

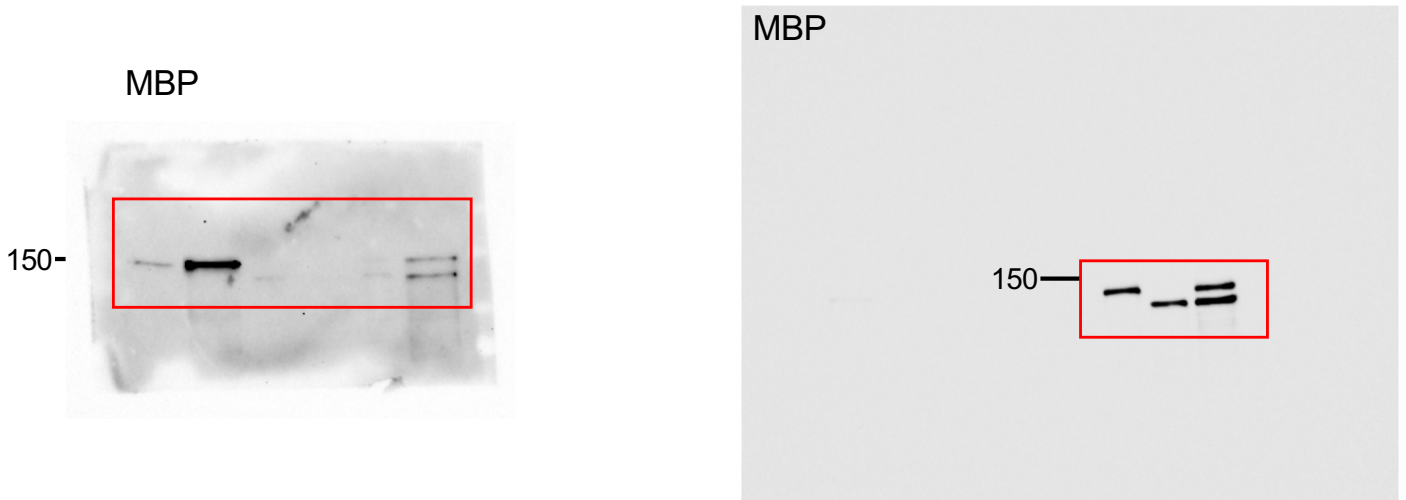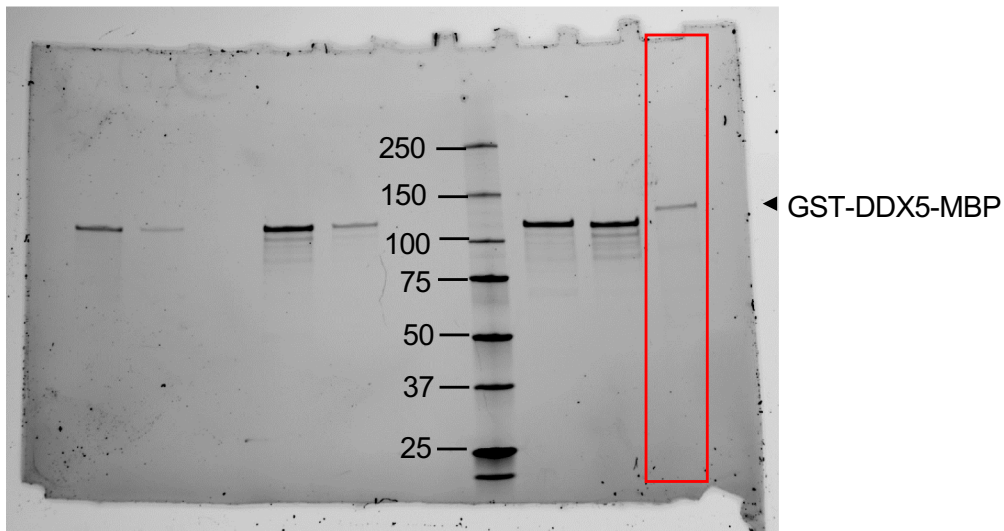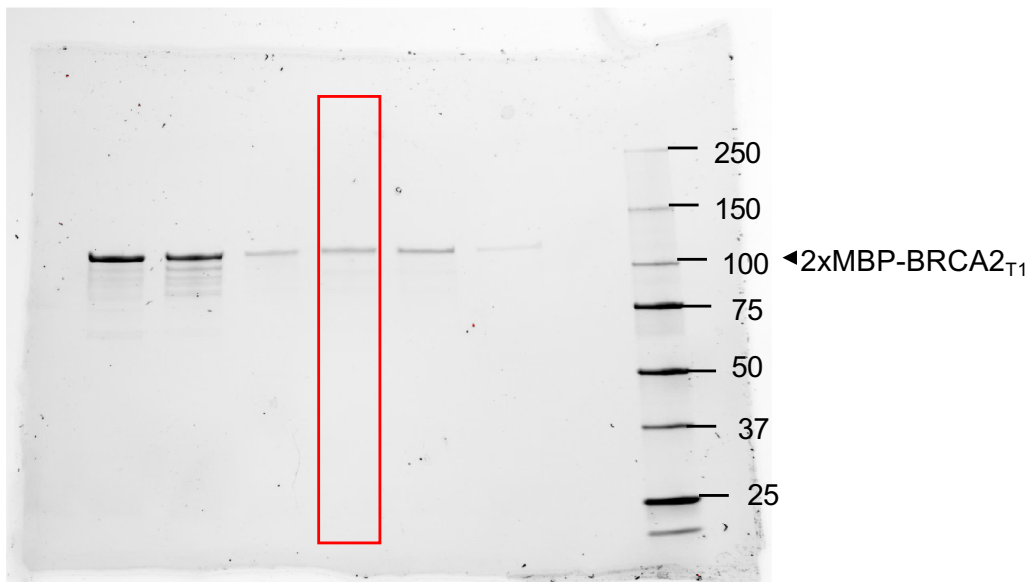

Supplement: EMBJ-40-e106018-s005.pdf [file EMBJ-40-e106018-s005.pdf]

**E**

BRCA2

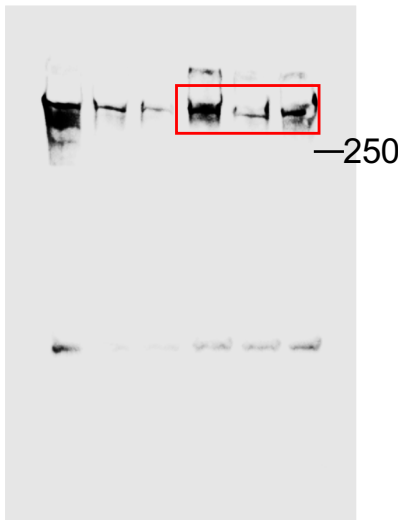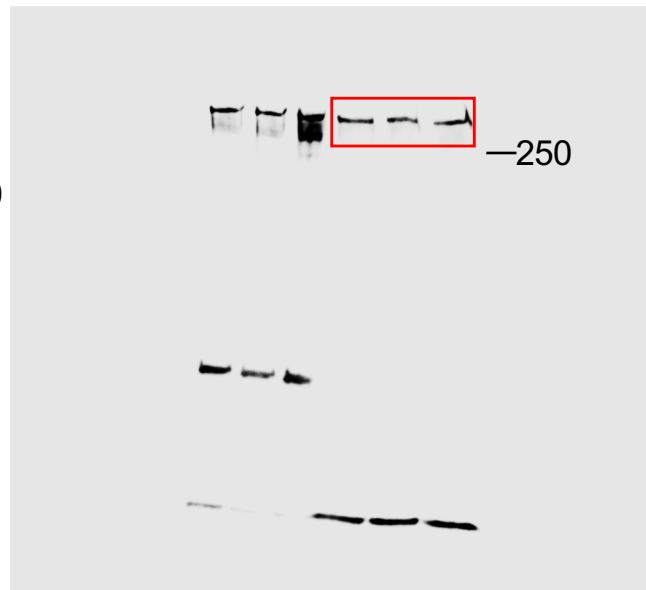

Tubulin

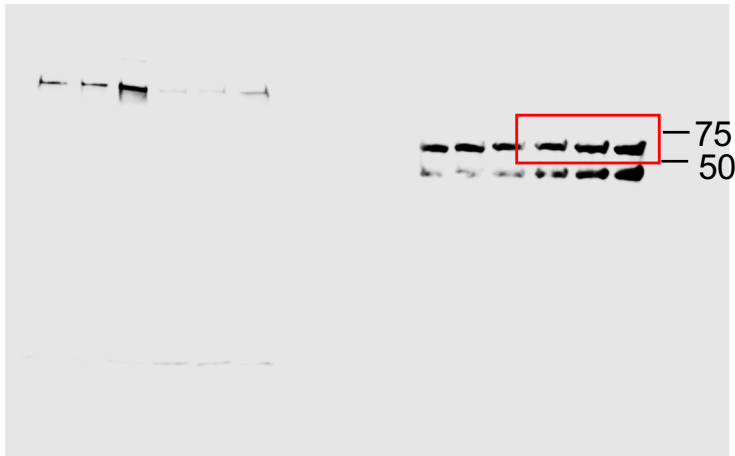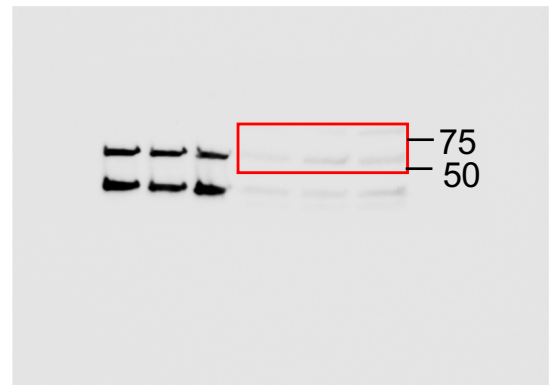

RAD51

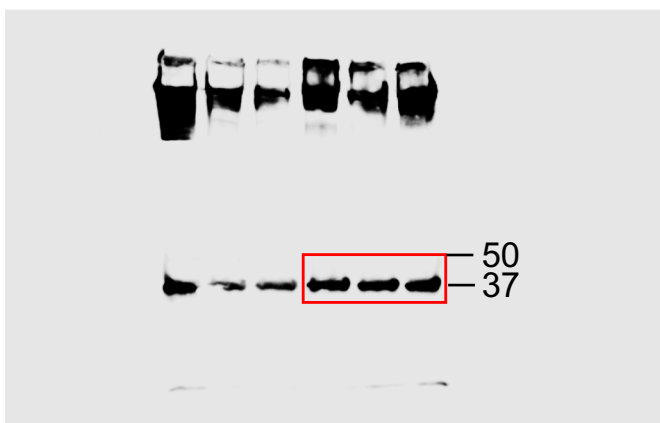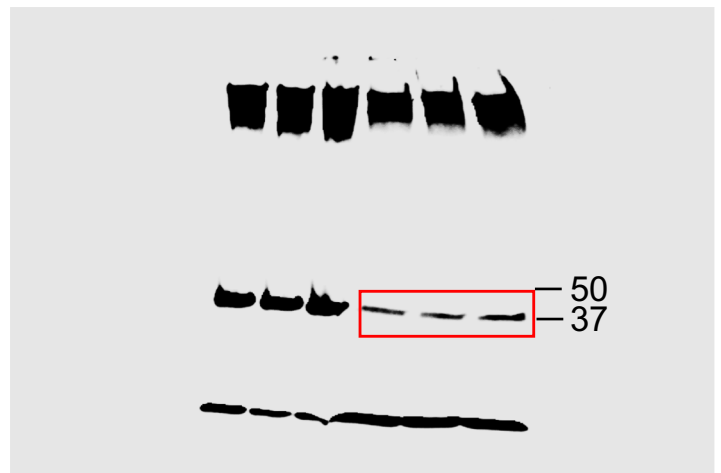

**E** Histone H3

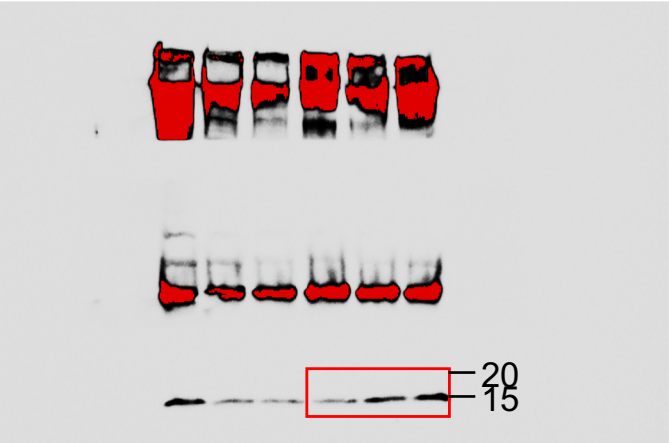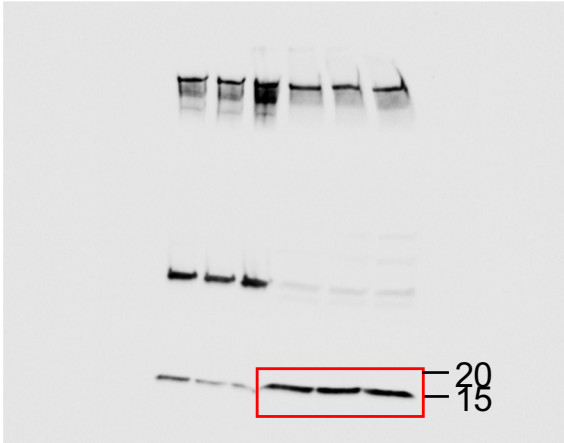

Stainfree

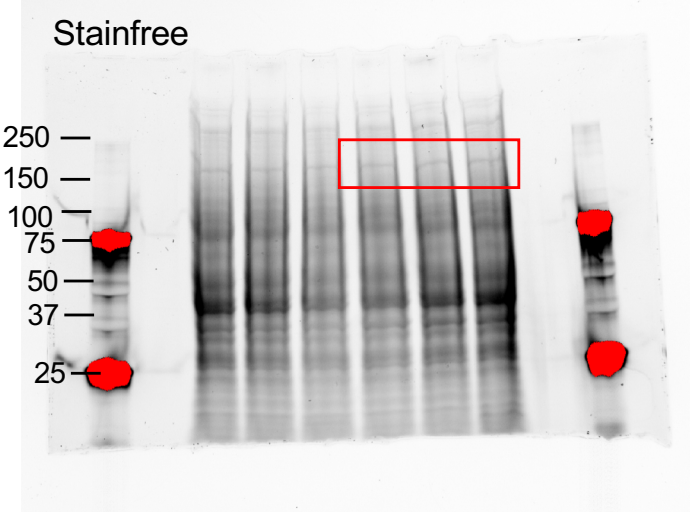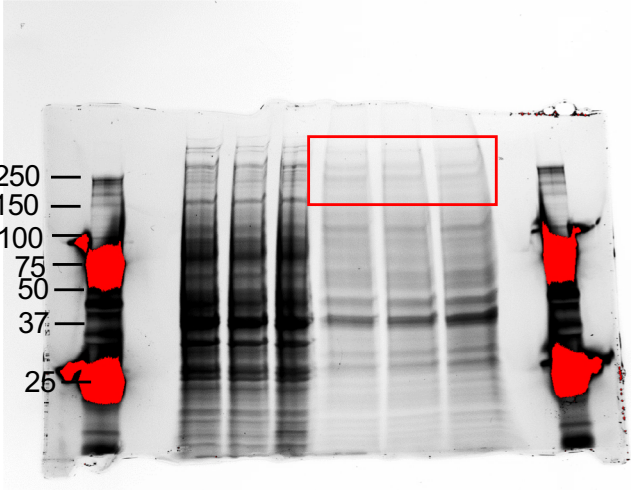

Supplement: EMBJ-40-e106018-s006.pdf [file EMBJ-40-e106018-s006.pdf]
